# Supplementary material for: Multi-site functional cathode interlayers for high-performance binary organic solar cells
Source: Royal Society of Chemistry journal article supplement (doi:10.1039/d2ta03827g), 2022-01-01
Supplement: d2ta03827g1.pdf [file d2ta03827g1.pdf]

## Supporting Information

### Multi-Site Functional Cathode Interlayers for High-Performance Binary Organic Solar Cells

Zhihui Chen,<sup>‡a</sup> Qi Li,<sup>‡a</sup> Yufeng Jiang,<sup>b</sup> Hyunbok Lee,<sup>c</sup> Thomas P. Russell,<sup>b, d</sup> and Yao Liu<sup>\*a</sup>

<sup>a</sup> State Key Laboratory of Chemical Resource Engineering, Beijing Advanced Innovation Center for Soft Matter Science and Engineering, Beijing University of Chemical Technology, Beijing 100029, China

<sup>b</sup> Polymer Science and Engineering Department, University of Massachusetts Amherst, 120 Governors Drive, Amherst, Massachusetts 01003, United States

<sup>c</sup> Department of Physics, Kangwon National University, 1 Gangwondaehak-gil, Chuncheon-si, Gangwon-do 24341, Republic of Korea

<sup>d</sup> Materials Sciences Division, Lawrence Berkeley National Lab, 1 Cyclotron Road, Berkeley, California 94720, United States

## 1. Material Characterizations

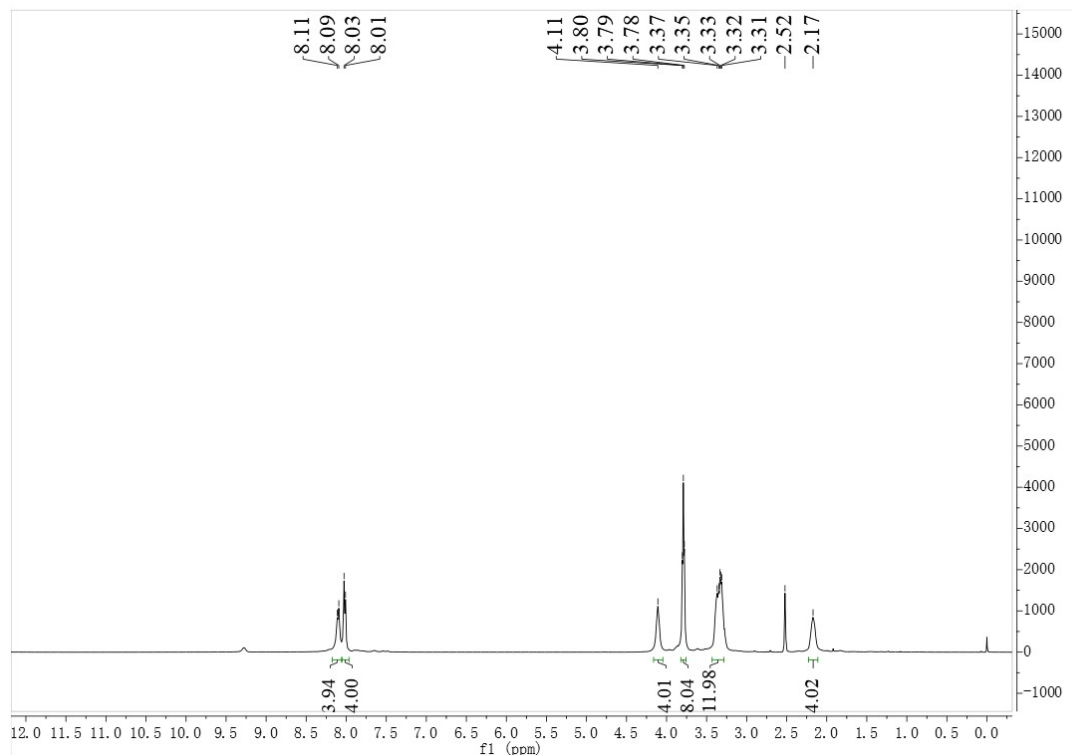

Figure S1. <sup>1</sup>H NMR spectrum of PDI-EA.

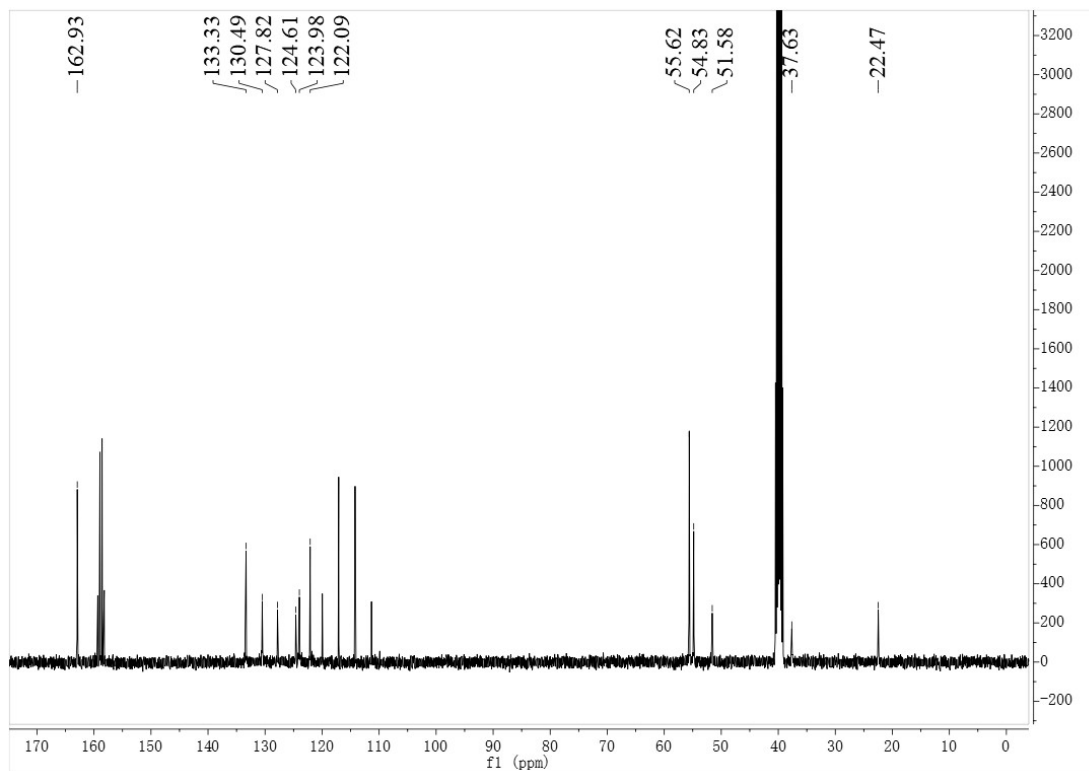

Figure S2. <sup>13</sup>C NMR spectrum of PDI-EA.

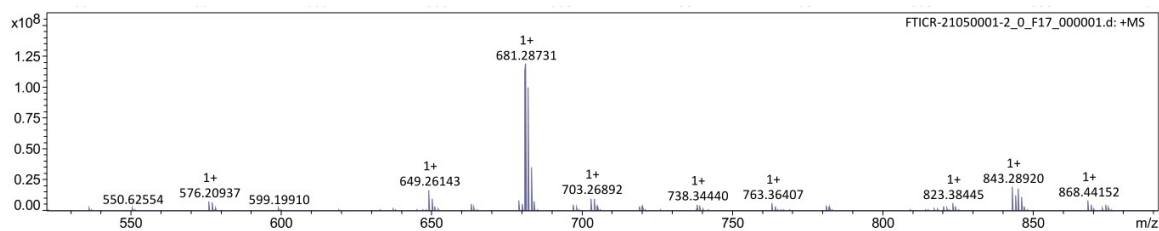

Figure S3. MALDI-TOF mass spectrometry of PDI-EA.=

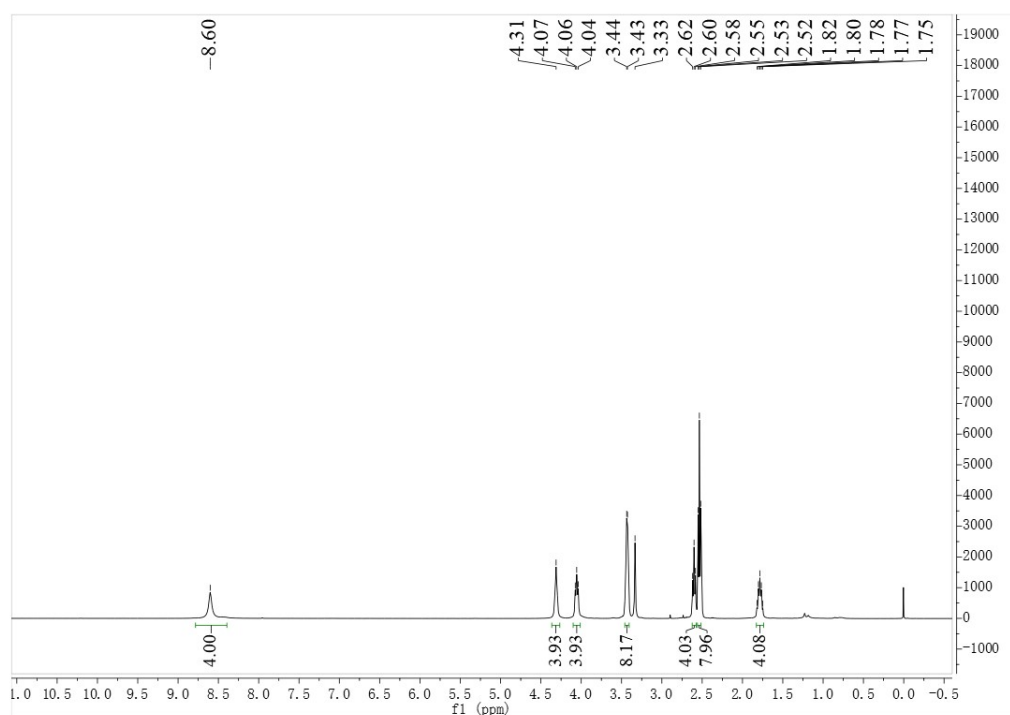

Figure S4.  $^1\text{H}$  NMR spectrum of NDI-EA

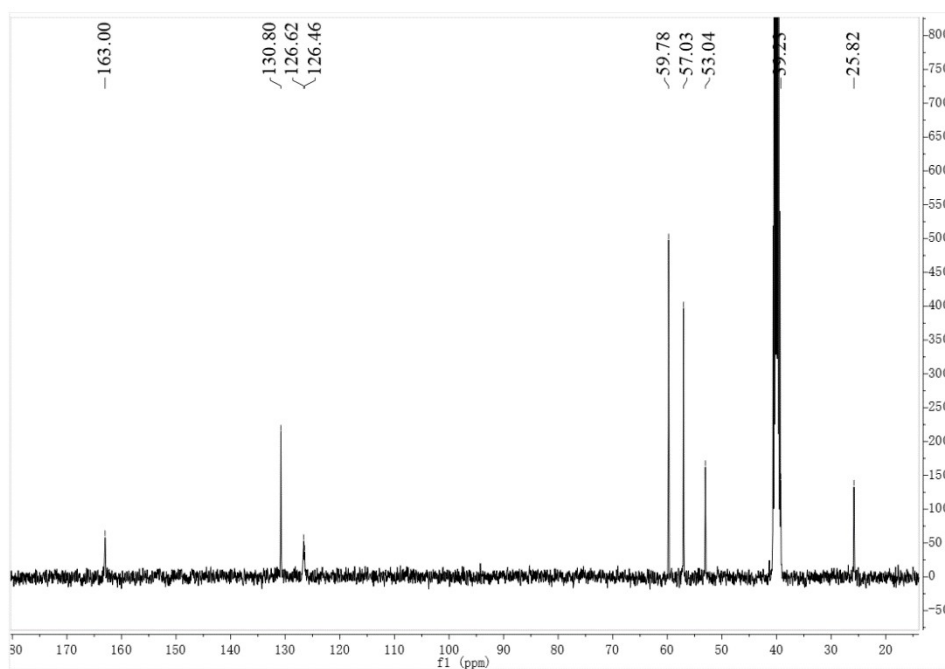

Figure S5.  $^{13}\text{C}$  NMR spectrum of PDI-EA

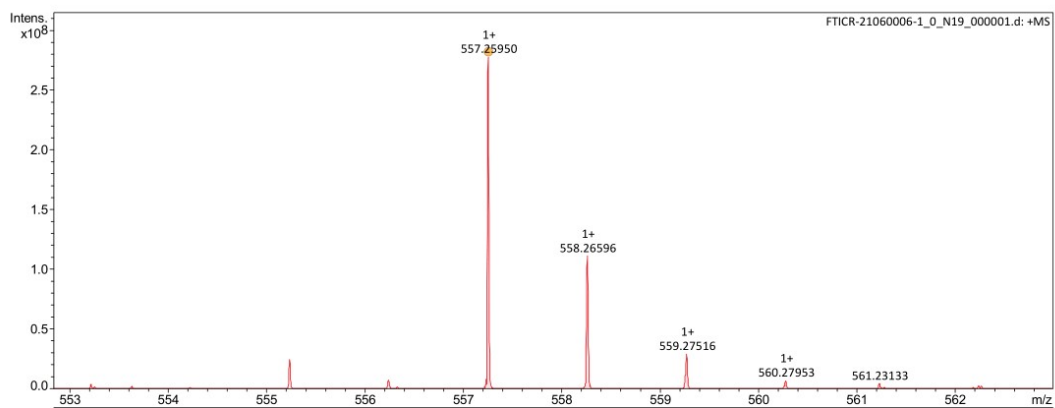

**Figure S6.** MALDI-TOF mass spectrometry of PDI-EA.

**Table S1.** The evaluated cost for chemical synthesis of PDI-EA.

| Materials                                       | Price (RMB) | Brand | Price of PDI-EA (\$) |
|-------------------------------------------------|-------------|-------|----------------------|
| 3,4,9,10-perylenetetracarboxylic dianhydride    | 312/100 g   | MREDA | \$2.75/g             |
| <i>N</i> -(3-aminopropyl) diethanolamine        | 6072/500 g  | TCI   |                      |
| <i>N,N</i> -dimethylformamide, 99.8%, Super dry | 207/L       | J&K   |                      |
| Methanol                                        | 50/L        | J&K   |                      |

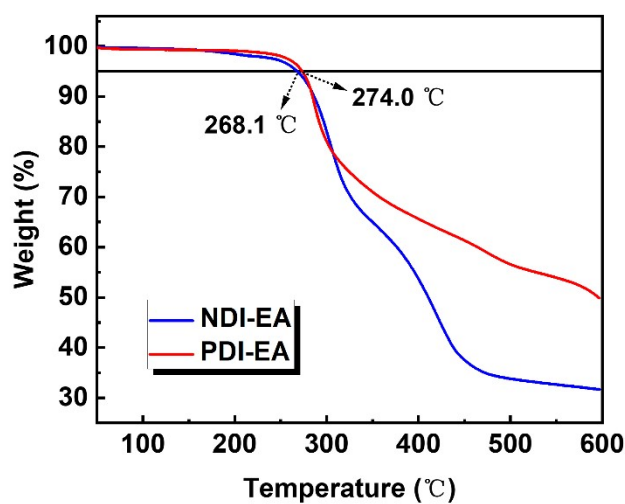

**Figure S7.** TGA plots of NDI-EA and PDI-EA.

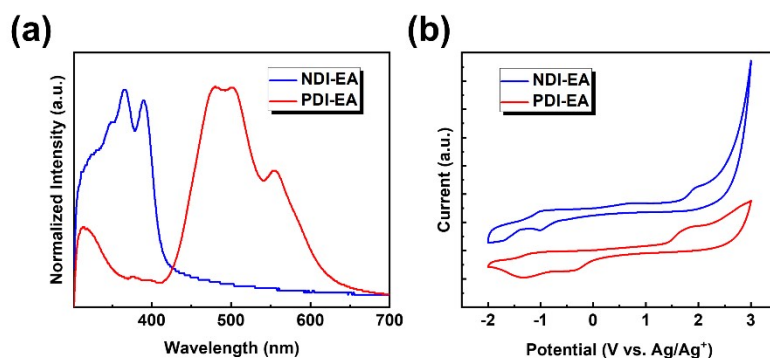

**Figure S8.** a) Normalized UV-vis spectra of PDI-EA and NDI-EA thin films. b) Cyclic voltammetry analyses of PDI-EA and NDI-EA.

**Table S2.** Summaries of optical and energetical properties based on PDI-EA and NDI-EA thin films.

| Interlayer materials | Film absorption (nm) |                 | $E_g^{opt}$ [eV] <sup>a)</sup> | LUMO [eV] <sup>b)</sup> | HOMO [eV] <sup>b)</sup> | EA [eV] <sup>c)</sup> | IP [eV] <sup>c)</sup> |
|----------------------|----------------------|-----------------|--------------------------------|-------------------------|-------------------------|-----------------------|-----------------------|
|                      | $\lambda_{max}$      | $\lambda_{edg}$ |                                |                         |                         |                       |                       |
| NDI-EA               | 389                  | 415             | 2.99                           | -3.65                   | -6.29                   | 3.32                  | 6.31                  |
| PDI-EA               | 480                  | 632             | 1.96                           | -4.03                   | -6.05                   | 4.03                  | 5.99                  |

a) Calculated from optical absorption edges:  $E_g^{opt} = 1240 / \lambda_{cdg}$ ; b) Calculated from CV:  $E_{HOMO/LUMO} = - (E_{onset}^{ox/red} + 4.80 - E_{onset, Fc/Fc^+})$ ; c) Calculated from UPS measurements:  $IP = hv - (E_{cutoff} - E_{H, onset})$

## 2. Device characterizations

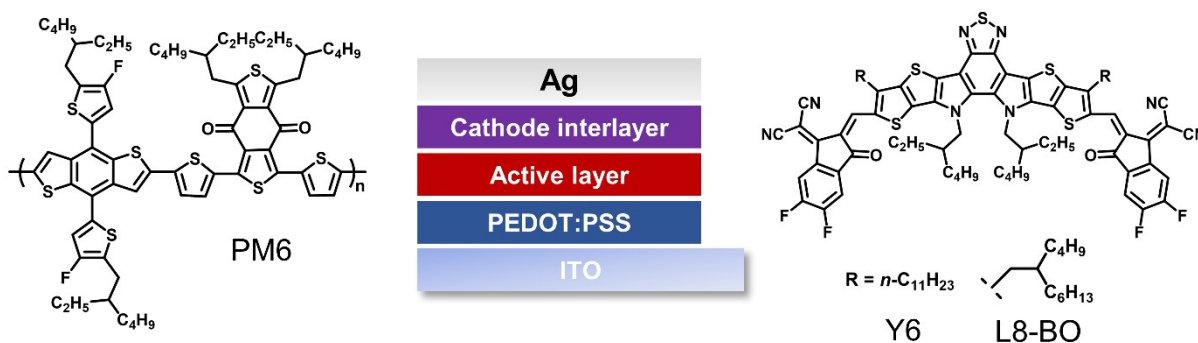

**Figure S9.** Schematic device configuration and chemical structures of PM6, Y6 and L8-BO involved in this work.

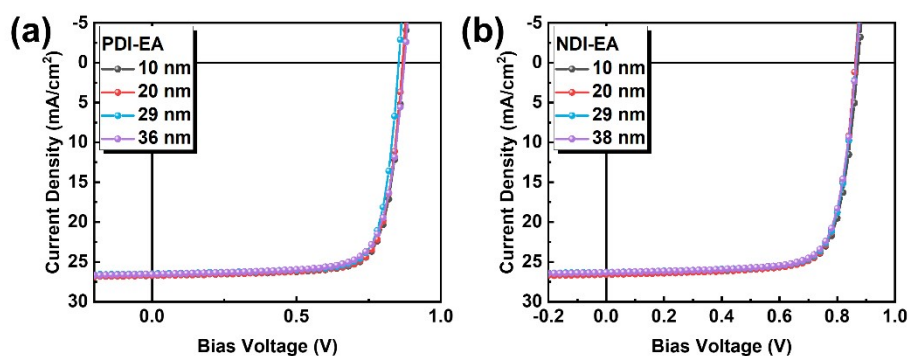

**Figure S10.** Thickness dependency of photovoltaic performances for a) PDI-EA and b) NDI-EA based OSCs.

**Table S3.** Summary of the recently recorded efficiencies in OSCs with different cathode interlayers.

| Interlayer material | Solar cell structure             | $PCE_{max}(\%)$ | Ref.      |
|---------------------|----------------------------------|-----------------|-----------|
| PDI-EA              | ITO/PEDOT:PSS/PM6:Y6/CIL/Ag      | 18.04           | This work |
| PDI-EA              | ITO/PEDOT:PSS/PM6:L8-BO/CIL/Ag   | 18.50           | This work |
| NDI-NI              | ITO/PEDOT:PSS/PM6:Y6/CIL/Ag      | 16.27           | 1         |
| PDINN               | ITO/PEDOT:PSS/PM6:Y6/CIL/Ag      | 17.23           | 2         |
| PDI-M               | ITO/PEDOT:PSS/PM6:Y6/CIL/Ag      | 17.65           | 3         |
| SiNcTI-Br           | ITO/PEDOT:PSS/PM6:Y6/CIM/Ag      | 16.71           | 4         |
| SME1                | ITO/PEDOT:PSS/PM6:Y6/CIL/Ag      | 17.5            | 5         |
| PBI-2P              | ITO/PEDOT:PSS/PM6:BTP-eC9/CIL/Ag | 18.4            | 6         |
| CTOC-N-Br           | ITO/PEDOT:PSS/PM6:BTP-4CI/CIL/Ag | 17.19           | 7         |
| HBC-S               | ITO/PEDOT:PSS/PM6:BTP-eC9/CIL/Ag | 18.05           | 8         |
| PNDIT-F3N-Br        | ITO/PEDOT:PSS/PM6:L8-BO/CIL/Ag   | 18.32           | 9         |

**Table S4.** Summary of photovoltaic performance based on devices PM6: Y6 prepared with NDI-EA and PDI-EA at different thicknesses. The average performances are shown in parenthetically and calculated from at least ten devices.

| Interlayer materials | Thickness (nm) | $V_{oc}$ (V)          | $FF$ (%)                | $J_{sc}$ (mA/cm <sup>2</sup> ) | $PCE$ (%)               |
|----------------------|----------------|-----------------------|-------------------------|--------------------------------|-------------------------|
| PDI-EA               | 10             | 0.87<br>(0.87 ± 0.01) | 77.70<br>(77.61 ± 0.19) | 26.69<br>(26.65 ± 0.13)        | 18.04<br>(17.99 ± 0.03) |
|                      | 20             | 0.86<br>(0.87 ± 0.01) | 77.57<br>(77.38 ± 0.02) | 26.70<br>(26.68 ± 0.07)        | 17.93<br>(17.91 ± 0.02) |
|                      | 29             | 0.85<br>(0.86 ± 0.01) | 77.99<br>(77.15 ± 0.81) | 26.49<br>(26.62 ± 0.13)        | 17.61<br>(17.62 ± 0.06) |
|                      | 36             | 0.87<br>(0.86 ± 0.01) | 75.49<br>(75.40 ± 0.51) | 26.54<br>(26.66 ± 0.27)        | 17.47<br>(17.40 ± 0.05) |
| NDI-EA               | 10             | 0.87<br>(0.87 ± 0.01) | 76.75<br>(76.56 ± 0.30) | 26.36<br>(26.45 ± 0.08)        | 17.62<br>(17.58 ± 0.05) |
|                      | 20             | 0.86<br>(0.86 ± 0.01) | 76.73<br>(76.44 ± 0.34) | 26.58<br>(26.53 ± 0.07)        | 17.56<br>(17.51 ± 0.04) |
|                      | 29             | 0.86<br>(0.86 ± 0.01) | 76.60<br>(76.26 ± 0.29) | 26.30<br>(26.31 ± 0.08)        | 17.39<br>(17.28 ± 0.10) |
|                      | 38             | 0.86<br>(0.86 ± 0.01) | 75.97<br>(75.86 ± 0.37) | 26.33<br>(26.25 ± 0.06)        | 17.28<br>(17.18 ± 0.12) |

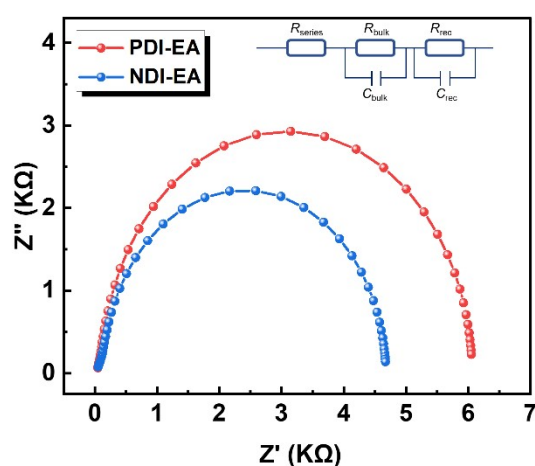

**Figure S11.** Nyquist plot of PDI-EA and NDI-EA modified devices and the equivalent-circuit model.

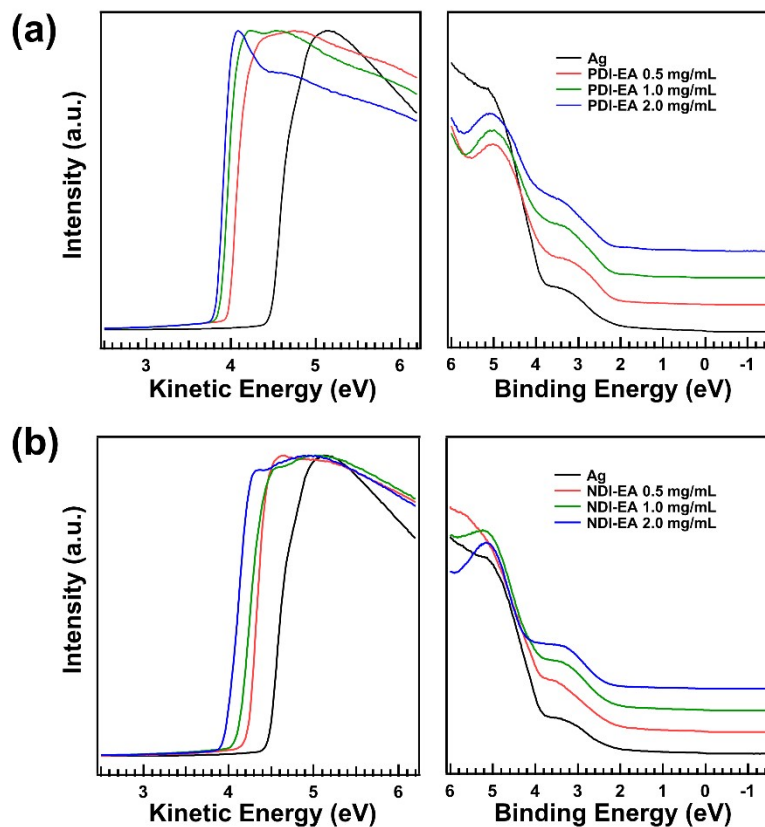

**Figure S12.** UPS spectra of bare Ag, PDI-EA and NDI-EA at different concentrations.

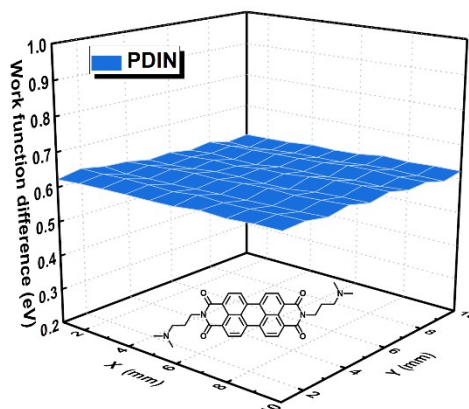

**Figure S13.** Work function reduction of Ag/PDIN and molecular structure of PDIN.



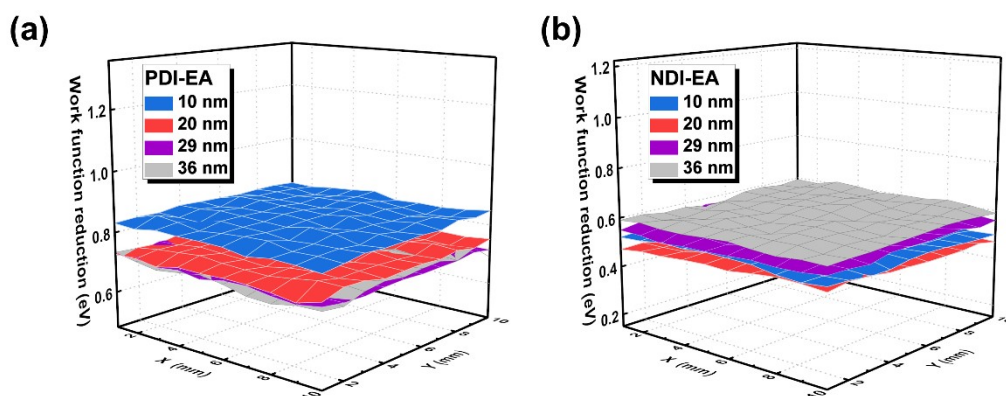

**Figure S14.** Thickness dependency of work function reductions for a) PDI-EA and b) NDI-EA modified Ag surfaces.

**Table S5.** Summaries of work function differences of Ag surfaces after modification by PDI-EA and NDI-EA with different thicknesses.

| Interlayer materials | 10 nm           | 20 nm           | 29 nm           | 36-38 nm        |
|----------------------|-----------------|-----------------|-----------------|-----------------|
| NDI-EA               | $0.52 \pm 0.01$ | $0.48 \pm 0.01$ | $0.56 \pm 0.01$ | $0.60 \pm 0.01$ |
| PDI-EA               | $0.84 \pm 0.01$ | $0.74 \pm 0.01$ | $0.72 \pm 0.01$ | $0.72 \pm 0.01$ |

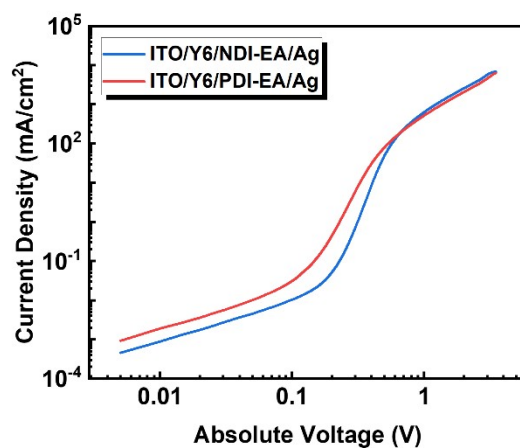

**Figure S15.** Space charge limited current plots of PDI-EA and NDI-EA based electron-only devices.

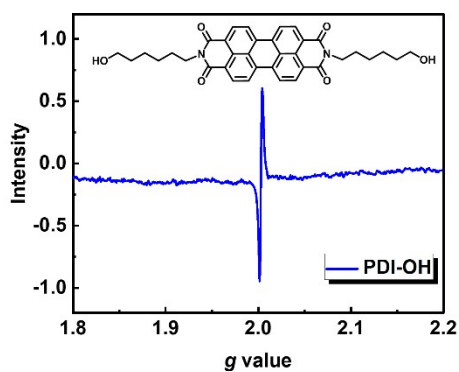

**Figure S16.** ESR signals for PDI-OH with inset of molecular structure of PDI-OH.

**Table S6.** The comparison between PDINO and PDI-EA.

| Interlayer materials | LUMO(eV) | HOMO(eV) | Conductivity (S cm <sup>-1</sup> ) | Work function of Ag (eV) | PM6:Y6 based OSC efficiency (%) |
|----------------------|----------|----------|------------------------------------|--------------------------|---------------------------------|
| PDI-EA               | -4.03    | -6.05    | $8.4 \times 10^{-3}$               | 3.82                     | 18.04                           |
| PDINO                | -3.63    | -6.21    | $7.6 \times 10^{-5}$               | 3.88                     | 15.17                           |

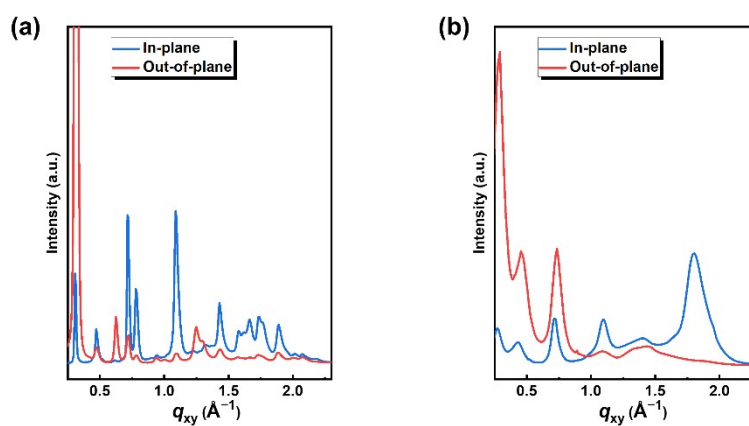

**Figure S17.** GIXD 1D line cuts for a) NDI-EA and b) PDI-EA thin films.

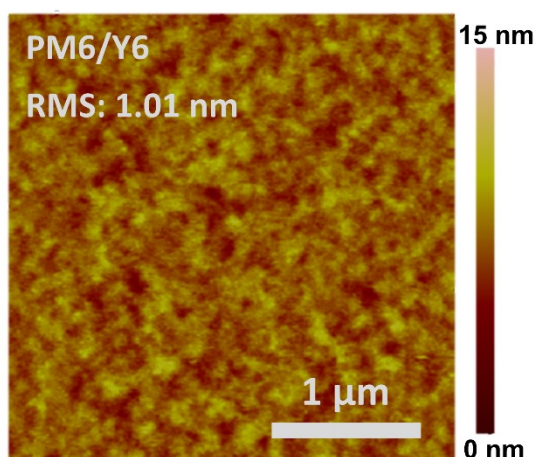

**Figure S18.** AFM images for neat PM6:Y6 surface morphologies.

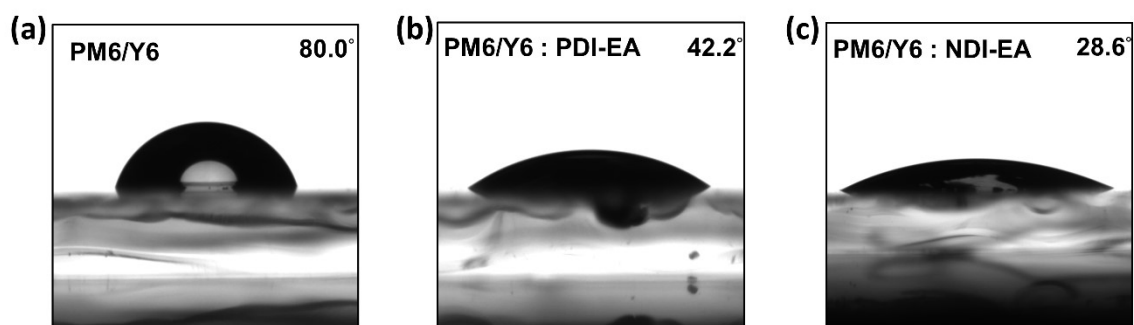

**Figure S19.** Contact angle images of a) neat PM6:Y6, b) PM6:Y6 modified by PDI-EA, and c) PM6:Y6 modified by NDI-EA with the water droplet on top.

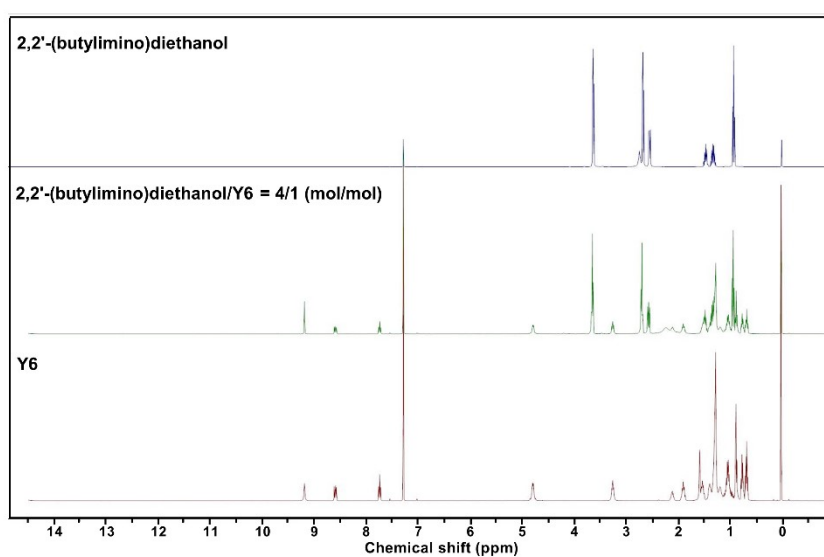

**Figure S20.**  $^1\text{H}$  NMR spectra of neat 2,2'-(butylimino)diethanol, 2,2'-(butylimino)diethanol/Y6 blends, and neat Y6.

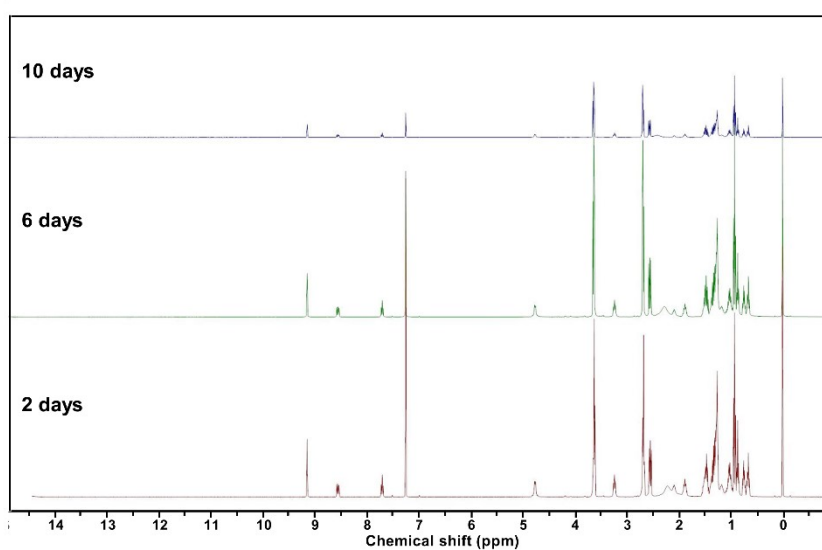

**Figure S21.**  $^1\text{H}$  NMR spectra of 2,2'-(butylimino)diethanol/Y6 blends on the different days.

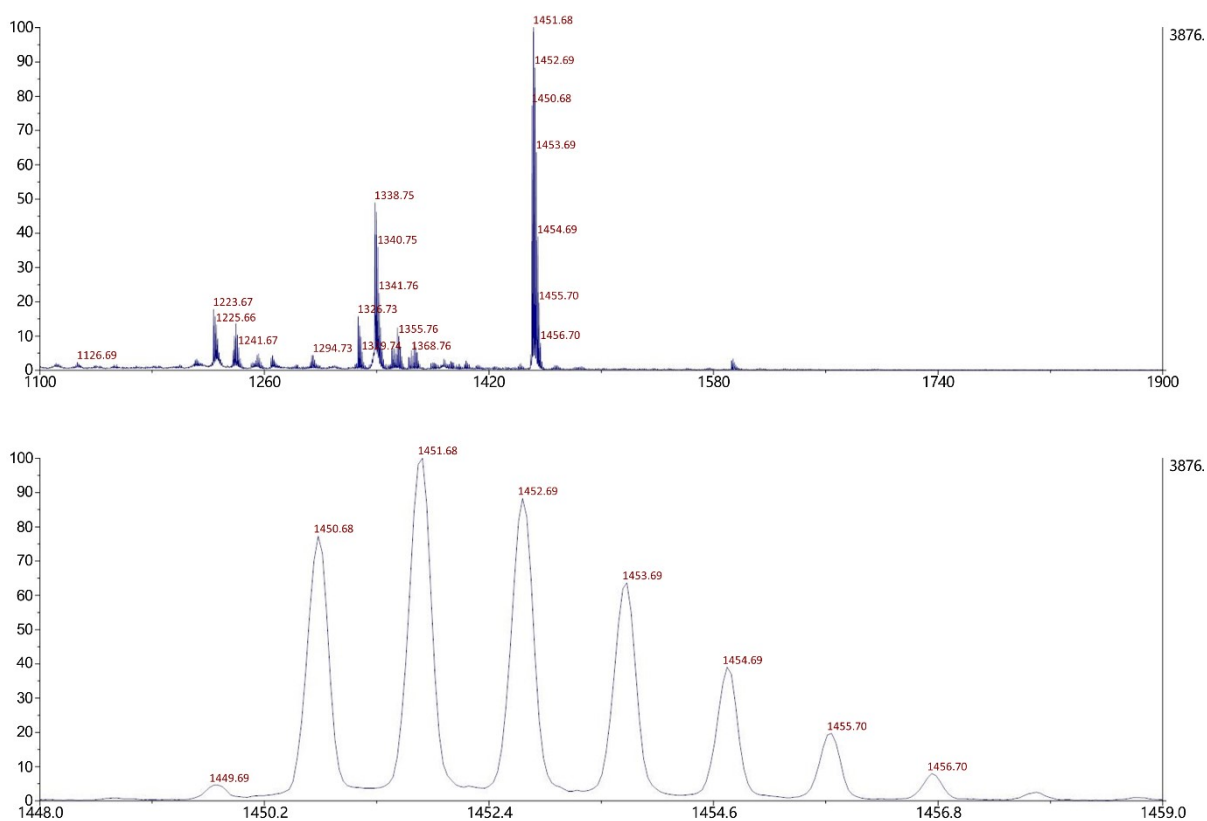

**Figure S22.** MALDI-TOF mass spectrometry of 2,2'-(butylimino)diethanol/Y6 blends (4/1 mol/mol) on the 10th day.

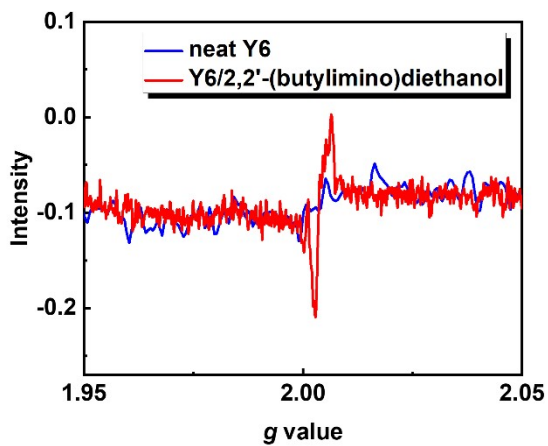

**Figure S23.** ESR profiles for neat Y6 and 2,2'-(butylimino)diethanol/Y6 (1/1 w/w) blends.

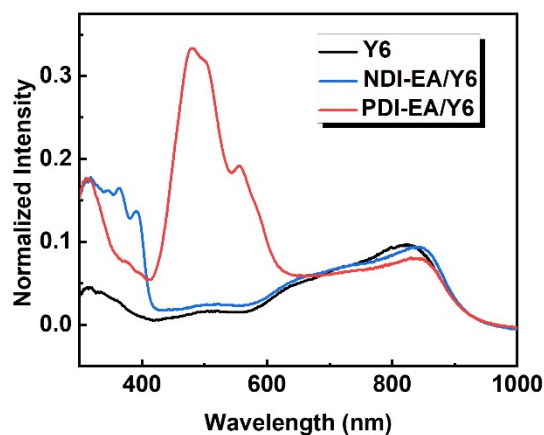

**Figure S24.** UV-vis spectra for neat Y6, NDI-EA coated on Y6, and PDI-EA coated on Y6 thin films.

## References

- 1 M. Liu, P. Fan, Q. Hu, T. P. Russell and Y. Liu, *Angew. Chem. Int. Ed.*, 2020, 59, 18131-18135.
- 2 J. Yao, B. Qiu, Z. G. Zhang, L. Xue, R. Wang, C. Zhang, S. Chen, Q. Zhou, C. Sun, C. Yang, M. Xiao, L. Meng and Y. Li, *Nat. Commun.*, 2020, 11, 1-10.
- 3 M. Liu, Y. Jiang, D. Liu, J. Wang, Z. Ren, T. P. Russell and Y. Liu, *ACS Energy Lett.*, 2021, 6, 3228-3235.
- 4 C. Cai, J. Yao, L. Chen, Z. Yuan, Z. G. Zhang, Y. Hu, X. Zhao, Y. Zhang, Y. Chen and Y. Li, *Angew. Chem. Int. Ed.*, 2021, 60, 19053-19057.
- 5 Y. Qin, Y. Chang, X. Zhu, X. Gu, L. Guo, Y. Zhang, Q. Wang, J. Zhang, X. Zhang, X. Liu, K. Lu, E. Zhou, Z. Wei and X. Sun, *Nano Today*, 2021, 41.
- 6 X. Wen, Y. Zhang, G. Xie, R. Rausch, N. Tang, N. Zheng, L. Liu, F. Würthner and Z. Xie, *Adv. Funct. Mater.*, 2022, DOI: 10.1002/adfm.202111706, 2111706.
- 7 C. Zhao, Z. Zhang, F. Han, D. Xia, C. Xiao, J. Fang, Y. Zhang, B. Wu, S. You, Y. Wu and W. Li, *Angew. Chem. Int. Ed.*, 2021, 60, 8526-8531.
- 8 L. Liu, S. Chen, Y. Qu, X. Gao, L. Han, Z. Lin, L. Yang, W. Wang, N. Zheng, Y. Liang, Y. Tan, H. Xia and F. He, *Adv. Mater.*, 2021, 33, 2101279.
- 9 C. Li, J. Zhou, J. Song, J. Xu, H. Zhang, X. Zhang, J. Guo, L. Zhu, D. Wei, G. Han, J. Min, Y. Zhang, Z. Xie, Y. Yi, H. Yan, F. Gao, F. Liu and Y. Sun, *Nat. Energy.*, 2021, 6, 605-613.
